# Supplementary material
Source: bioRxiv or medRxiv preprint supplement (https://www.biorxiv.org/highwire/filestream/37685/field_highwire_adjunct_files/0/126839-1.pdf)
Supplement: Supplementary file [file 126839-1.pdf]

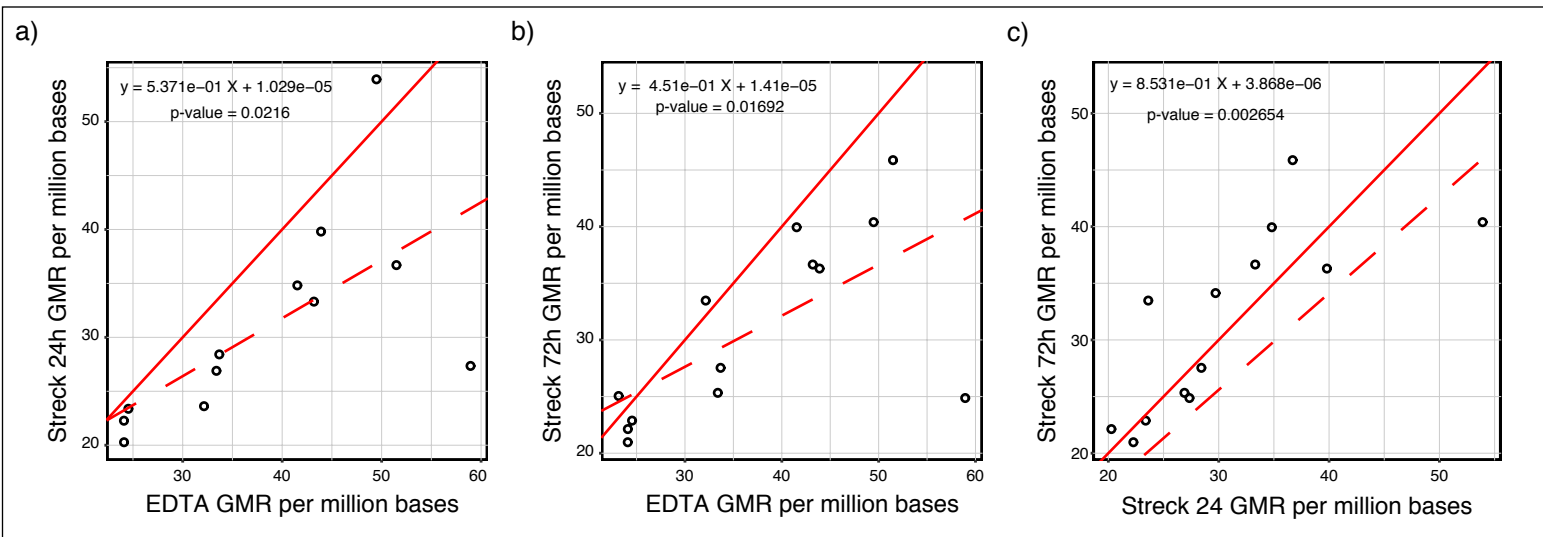

Supplemental Figure 1: Correlation of GMR between paired samples from different blood collection protocols.

Dashed line represents linear fit as indicated. Solid line with slope of 1 included for reference.

a) Comparison of GMR between EDTA and Streck 24h showed significant correlation (Pearson  $r=0.652$ ,  $p=0.022$ ,  $n=12$  pairs).

b) Comparison of GMR between EDTA and Streck 72h showed significant correlation (Pearson  $r=0.647$ ,  $p=0.017$ ,  $n=13$  pairs).

c) Comparison of GMR between Streck 24h and Streck 72h showed significant correlation (Pearson  $r=0.758$ ,  $p=0.003$ ,  $n=13$  pairs).
